# Supplementary material
Source: HighWire-hosted journal article supplement (https://bmjopen.bmj.com/content/13/12/e075222)
Supplement: inline-supplementary-material-3 [file inline-supplementary-material-3.pdf]

**Supplemental Table 3. Spearman's  $\rho$  correlation results of relationship between PedEyeQ Domain Scores and patients' best corrected vision acuity**

| <b>PedEyeQ domains<br/>(by age group<br/>for child and proxy)</b> | <b>Better-eye BCVA<br/>(logMAR)</b> | <b>Worse-eye BCVA<br/>(logMAR)</b> |
|-------------------------------------------------------------------|-------------------------------------|------------------------------------|
| <b>Child 5–11 years (N=28)</b>                                    |                                     |                                    |
| Functional Vision                                                 | -0.204                              | <b>-0.427</b>                      |
| Bothered by eyes/vision                                           | 0.008                               | -0.110                             |
| Social                                                            | -0.190                              | -0.314                             |
| Frustration/worry                                                 | -0.271                              | -0.281                             |
| <b>Child 12–17 years (N=9)</b>                                    |                                     |                                    |
| Functional Vision                                                 | -0.353                              | <b>-0.689</b>                      |
| Bothered by eyes/vision                                           | -0.300                              | <b>-0.791</b>                      |
| Social                                                            | -0.523                              | <b>-0.776</b>                      |
| Frustration/worry                                                 | -0.363                              | <b>-0.429</b>                      |
| <b>Proxy 0–4 years (N=14)</b>                                     |                                     |                                    |
| Functional Vision                                                 | -0.153                              | -0.093                             |
| Bothered by eyes/vision                                           | -0.084                              | -0.275                             |
| Social                                                            | -0.028                              | -0.474                             |
| <b>Proxy 5–11 years (N=28)</b>                                    |                                     |                                    |
| Functional Vision                                                 | -0.191                              | -0.294                             |
| Bothered by eyes/vision                                           | -0.141                              | -0.256                             |
| Social                                                            | -0.024                              | -0.135                             |
| Frustration/worry                                                 | -0.070                              | -0.23                              |
| Eye-care                                                          | -0.028                              | -0.307                             |
| <b>Proxy 12–17 years (N=9)</b>                                    |                                     |                                    |
| Functional Vision                                                 | -0.332                              | -0.167                             |
| Bothered by eyes/vision                                           | -0.198                              | -0.294                             |
| Social                                                            | <b>-0.688</b>                       | <b>-0.753</b>                      |
| Frustration/worry                                                 | -0.094                              | -0.207                             |
| Eye-care                                                          | -0.128                              | -0.186                             |
| <b>Parent (N=51)</b>                                              |                                     |                                    |
| Impact on Parent / Family                                         | -0.168                              | -0.242                             |
| Worry about Child's Eye Condition                                 | -0.275                              | -0.199                             |
| Worry about Child's Self-Perception<br>and Interactions           | -0.217                              | -0.213                             |
| Worry about Child's Visual Function                               | -0.285                              | -0.096                             |

Bold values indicate  $P < 0.05$ .
